# Supplementary material for: The Genetic Control of Polyacetylenes Involved in Bitterness of Carrots (Daucus Carota L.): Identification of QTLs and Candidate Genes From the Plant Fatty Acid Metabolism
Source: Research Square preprint supplement (doi:10.21203/rs.3.rs-1102862/v1), 2021-11-30
Supplement: Supplementary file 2 [file 655845c338e34cf159e27504.docx]

0

10

20

30

40

50

60

70

***DcFAD2-2***_DCAR_027583

***DcFAD2-26***

73.8

***DcFAD2-1***_DCAR_027616

50.6

***DcFAD2-25***

66.3

***DcFAD2-3****_*DCAR_003420

***DcFAD2-9***_DCAR_027615

61.4

23.2

***DcFAD2-4***_DCAR_027655

***DcFAD2-28***

88.3

***DcFAD2-5***_DCAR_025967

***DcFAD2-27***

58.1

18.9

***DcFAD2-10***_DCAR_020161

69.5

***DcFAD2-7*_**DCAR_013552

***DcFAD2-8***_DCAR_013548

86.4

PcELI12_PCU86734

70.9

***DcFAD2-6***_DCAR_017011

100.0

90.4

PgFAD2-1_ctg89730

67.9

Ca_CREP1_CAA76158

HaACET_AAO38032

100.0

100.0

***DcFAD2-18***_DCAR_002026

AhDES_AAB84262

41.0

BoDES_AAC31698

AtFAD2_NP_187819.1

74.1

31.8

HaFAD2_AAL68983.1

CpDES_CAA76157

100.0

26.0

***DcFAD2-11***_DCAR_019786

***DcFAD2-12***_DCAR_019845

98.9

***DcFAD2-19***_DCAR_013547

100.0

68.9

59.2

***DcFAD2-13***_DCAR_017010

***DcFAD2-17***_DCAR_013551

98.3

***DcFAD2-16***_DCAR_013549

67.2

***DcFAD2-20***_DCAR_019787

89.9

***DcFAD2-14***_DCAR_011708

***DcFAD2-15***_DCAR_011709

100.0

***DcFAD2-21***_DCAR_027614

59.9

100.0

15.7

***DcFAD2-29***

***DcFAD2-31***

40.5

***DcFAD2-30***

100.0

28.7

***DcFAD2-22***_DCAR_013553

***DcFAD2-23***_DCAR_017012

100.0

Clade I

Clades II a, b

Clade III

Clade IV

**Figure S5** Phylogenetic tree of *Daucus* *FAD2* proteins (DCAR numbers, [5]), the published *Petroselinum* ELI12 acetylenase [36], a *Panax ginseng* *FAD2* and some other putative acetylenases and desaturases (numbers are NCBI accession numbers; Dc, *Daucus carota*; Pc, *Petroselinum crispum*; Pg, *Panax ginseng*; Ca, *Crepis alpina*; Ha, *Helianthus* *annuus;* At, *Arabidopsis thaliana*; Bo, *Borago officinalis*; Cp, *Crepis palaestina*; Ah, *Arachis hypogaea*). Newly identified carrot *FAD2s* are labeled in blue (this study). Multiple sequence alignment was performed by ClustalW using the Lasergene (DNASTAR) software package. A phylogenetic tree was constructed using the Kimura distance formula to calculate distance values and bootstrap analysis (1,000 replicates). Numbers indicate bootstrap replication, and branch length is scaled below the tree indicating the number of amino acid substitutions per 100 amino acids.
