# Supplementary material for: The Genetic Control of Polyacetylenes Involved in Bitterness of Carrots (Daucus Carota L.): Identification of QTLs and Candidate Genes From the Plant Fatty Acid Metabolism
Source: Research Square preprint supplement (doi:10.21203/rs.3.rs-1102862/v1), 2021-11-30
Supplement: Supplementary file 3 [file 77fe00a26329f999adb8e399.docx]

**Data S1:** Coding sequences (CDS) and predicted proteins of newly identified carrot *FAD2* and *CER1* genes.

***DcFAD25*** (chromosome 8)

**Coding sequence (CDS)**

ATGGGTGCAGGTGGACGCATGTCTGCTCCTAATGCCAAGAAAACTCAAACAGAAGCACTTCGACGTGCCCCTCATGAGAA

ACCTCCATTCACCATTGGTGACCTTAAGAAAGCCATTCCTGCTCATTGCTTTGAAAAGTCACTTGTCACTTCTTTTCGAT

ACCTCATTCAAGATCTCCTCATGGCCTATGCCCTCTACTATATTGCCACTAATTACATAGAGCAGTATCTTCCATATCCT

CTGAATTACGTCGGTTGGGCTGCTTACATTGCTGTCCAGGGGTGTGTCTTGACGGGAGCTTGGGTGGTGGGTCACGAATG

TGATCACGACGCCTTCAGTGATTATGGTTGGGTGAATGACCTTGTTGGCCTTATTGTCCACTCTTCTCTCATGGTTCCAT

ATTTCTCTTGGAAAATTAGCCACAGACGTCACCACGCCAACACTCAATCACTTGAGAACGACGAGGTTTATGTCCCGAGG

TTCAAGTCCAACATCCGGAACTACTACAAAATTCTCAACAACCCACCCGGCCGTGTCCTTGTGTGGGTTACCACACTCCT

CATAGGCTTCCCTCTGTATCTGATGTTCAATGTTTCGGGACACAAGTATGAGAGGTGGACTTCTCACTATGATCCCCATA

GCCCTCTTTACACAGAACGTGAGCGCAAGCAGATCATTGTGTCTGATCTTGCCATTCTTGCTGTTATCTATGGGCTGTAC

AATCTAGTATTAGCCAAAGGATTTGTTTGGGTTTTCTGTGTTTATGGAGGTCCATTGCTAGTTGTCAACGGATGGTTTAC

ATTAATTACAATCCTCAATCACACTCATCCTTCGATTCCTTACTACGACTCAACTGAATGGGACTGGTTAAGAGGAGCTC

TCTGCACTGTTGACAGAGATTATGGAATTCTGAACAAGGTATTCCACAACGTGTGCAATGCTCATGTCTGTCACCACATA

TTCTCCATGATCCCACATTACCACGGACTAGAAGCCACAGAGGCCATGAAGCCTTTACTTGGAGATTACTATCAATATGA

TGGAACTCCAATTCTAAAGGCCATGTACCGAGAAATGAAGGAATGCATTTACGTGGAGAAAGATGAAGGCGAGACTAAAG

GAGTCTACTGGTACCGAAAGGATATATAG

**Predicted protein**

MGAGGRMSAPNAKKTQTEALRRAPHEKPPFTIGDLKKAIPAHCFEKSLVTSFRYLIQDLLMAYALYYIATNYIEQYLPYP

LNYVGWAAYIAVQGCVLTGAWVVGHECDHDAFSDYGWVNDLVGLIVHSSLMVPYFSWKISHRRHHANTQSLENDEVYVPR

FKSNIRNYYKILNNPPGRVLVWVTTLLIGFPLYLMFNVSGHKYERWTSHYDPHSPLYTERERKQIIVSDLAILAVIYGLY

NLVLAKGFVWVFCVYGGPLLVVNGWFTLITILNHTHPSIPYYDSTEWDWLRGALCTVDRDYGILNKVFHNVCNAHVCHHI

FSMIPHYHGLEATEAMKPLLGDYYQYDGTPILKAMYREMKECIYVEKDEGETKGVYWYRKDI.

***DcFAD26*** (chromosome 8)

**Coding sequence (CDS)**

ATGGGTGCAGGTGGGCGAATGTCGGATCCTCCTAAAGGCAAAAAAACTGAAACAGAAGCACTTCGACGTGCTCCTCATGA

GAAACCCCCTTTCACCATAGGTGACCTCAAGAAAGCCATTCCTGCTCATTGCTTCGAAAAATCACTCATCACTTCTTTCC

GATATCTTATTCAAGATCTCCTCATGGCCTATGCCCTTTACTATGTTGCCACAAATTACATAGACCAGTATTTACCCCAT

CCAATCAACTACTTGGGTTGGGCAGTTTACATTGCTGTACAGGGCTGTGTCCTCACCGGGGCTTGGGTTGTAGGCCATGA

GTGTGATCATGATGCCTTCAGTGACTATGGCTGGATCAATGACCTTGTTGGCCTTATTGTCCACTCTTCTCTCATGGTCC

CTTATTTCTCTTGGAAAATTAGCCACAGACGTCACCACGCCAACACTCAGTCGCTTGAGAATGATGAAGTTTACGTTCCC

AGATTCAAGTCCAACATCAGGAACTACTACAAAATTCTCAACAACCCACCCGGTCGTGTCCTTGTCTGGGTTACCACACT

TCTCATAGGTTTCCCTCTATATTTGATGTTCAATGTTTCTGGACACAAGTATGAGAGGTGGACTTCACATTATGATCCCC

ACAGCCCTCTTTACACAGAACGTGAGCGCAAGCAGATCATTGTGTCTGATCTTGCCATTCTTGCTGTTATCTATGGGCTG

TACAATCTAGTATTAGCCAAAGGATTTGTCTGGGTTTTCTGTGTCTATGGAGGTCCATTGCTTGTTGTCAATGGATGGTT

CACATTGATCACCATCCTTAACCATACTCATCCCTCAGTGCCTTACTACGATTCAACCGAATGGGATTGGTTGAGGGGAG

CTCTCTGCACTGTGGACAGAGATTATGGAATTTTGAACAAGGTATTCCACAATGTGTGCAATGCTCATGTCTGTCACCAC

ATATTCTCCATGATCCCACATTACCACGGACTTGAAGCAACAGAGGCCATGAAGCCAGTGTTGGGCGATTATTATCAGTA

TGATGGAACTCCAATACTTAAGGCCATGTACAGAGAAATGAAGGAATGCATTTACGTGGAGAAGGATGAAGGCGAGACCA

AAGGAGTCTACTGGTACAGAAAGGATATTTAG

**Predicted protein**

MGAGGRMSDPPKGKKTETEALRRAPHEKPPFTIGDLKKAIPAHCFEKSLITSFRYLIQDLLMAYALYYVATNYIDQYLPH

PINYLGWAVYIAVQGCVLTGAWVVGHECDHDAFSDYGWINDLVGLIVHSSLMVPYFSWKISHRRHHANTQSLENDEVYVP

RFKSNIRNYYKILNNPPGRVLVWVTTLLIGFPLYLMFNVSGHKYERWTSHYDPHSPLYTERERKQIIVSDLAILAVIYGL

YNLVLAKGFVWVFCVYGGPLLVVNGWFTLITILNHTHPSVPYYDSTEWDWLRGALCTVDRDYGILNKVFHNVCNAHVCHH

IFSMIPHYHGLEATEAMKPVLGDYYQYDGTPILKAMYREMKECIYVEKDEGETKGVYWYRKDI.

***DcFAD27*** (chromosome 8)

**Coding sequence (CDS)**

ATGGGTGCAGGTGGGCGTATGTCTGCTCCCTCTAGTGTCAAAAAAACTGAAACAGAGGCACTTCGACGTGCTCCTCATGA

GAAACCTCCTTTCACCATTGGTGACCTCAAGAAAGCCATTCCTGCCCATTGCTTTGAAAAATCTTTAGTCACTTCTTTTC

GATATCTCATTCAGGATCTTCTGATGGCCTATGCCCTCTACTATGTCGCTACTAATTACATCGACCAATATCTTCCTTAT

CCAATCAACTACTTGGGTTGGGCAGCTTATATTGCTGTTCAAGGCTGTGTGTTAACAGGGGCCTGGGTTGTGGGTCATGA

ATGTGATCATGATGCATTCAGCAATTATAATTGGATTAATGATCTCGTTGGCCTTGTTGTCCATTCTTCTCTCTTGGTGC

CATACTTCTCTTGGAAAATTAGTCACCGTCGTCACCATGCCAATACTCAATCCCTTGAAAATGATGAGGTGTATGTCCCT

AGATTCAAGTCCAACATCCGGAACTACTACAAAATTCTCAACAATCCACCAGGCCGTGTCCTCGTCTGGCTTATCACACT

CCTCATAGGCTTCCCAATATACTTGATGTTCAATGTTTCGGGACACAAGTATGAGAGGTGGACTTCACACTATGATCCCC

ATAGCCCTCTTTACACAGAACGTGAGCGCAAGCAGATCATTGTGTCTGATCTTGCCATTCTTGCTGTTATCTATGGGCTG

TACAATCTAGTATTAGCCAAAGGATTTGTCTGGGTTTTCTGTGTTTATGGAGGTCCGTTGCTCGTTGTCAACGGATGGTT

CACATTGATCACCATCCTCAACCACACTCATCCCTCTGTGCCTTACTATGATTCAACCGAATGGGATTGGTTGAGGGGAG

CTCTCTGCACTGTGGACAGAGATTATGGAATTTTGAACAAGGTATTCCACAATGTGTGCAATGCTCATGTGTGTCACCAC

ATATTCTCCATGATCCCACATTACCACGGACTCGAAGCCACAGAGGCCATGAAGCCTGTATTGGGTGAATATTATCAGTA

TGATGGAACTCCGATTCTCAAGGCAATGTACAGAGAAATGAAGGAATGCATTTACGTGGAGAAAGATGAAGGCGAGACCA

AAGGAGTCTACTGGTACAAAAAGGATATTTAG

**Predicted protein**

MGAGGRMSAPSSVKKTETEALRRAPHEKPPFTIGDLKKAIPAHCFEKSLVTSFRYLIQDLLMAYALYYVATNYIDQYLPY

PINYLGWAAYIAVQGCVLTGAWVVGHECDHDAFSNYNWINDLVGLVVHSSLLVPYFSWKISHRRHHANTQSLENDEVYVP

RFKSNIRNYYKILNNPPGRVLVWLITLLIGFPIYLMFNVSGHKYERWTSHYDPHSPLYTERERKQIIVSDLAILAVIYGL

YNLVLAKGFVWVFCVYGGPLLVVNGWFTLITILNHTHPSVPYYDSTEWDWLRGALCTVDRDYGILNKVFHNVCNAHVCHH

IFSMIPHYHGLEATEAMKPVLGEYYQYDGTPILKAMYREMKECIYVEKDEGETKGVYWYKKDI.

***DcFAD28*** (chromosome 8)

**Coding sequence (CDS)**

ATGGGTGCTGGTGGACGTATGTCCGCTCCTACTGGAAAGAAAACTGAAGCAGAAGCACTCCGACGTGCTCCTCATGAGAA

ACCTCCATTCACTATCGGAGACCTGAAAAAGGCTATTCCTGCCCATTGCTTTGAAAAATCAGTCATCACTTCTTTCCGTT

ACCTCATCCAGGATCTCATCATGGCCTATGCCCTCTACTATGTTGCCACAAACTATATAGACCAGTACTTACCCCATCCT

CTTAACTACTTGGGTTGGGCAGCTTACATTGCTGTTCAGGGCTGTGTCTTGACCGGGGCTTGGGTTGTAGGCCATGAATG

TGATCATGATGCCTTCAGTGATTATGGTTGGGTCAATGACCTTGTTGGCCTTGTTGTCCATTCTTCTCTTCTGGTCCCTT

ACTTCTCTTGGAAAATTAGCCACCGTCGTCATCATGCCAACACTCAGTCCCTTGAGAATGATGAGGTTTATGTCCCAAGA

TTCAAATCCAACATCAGGAACTACTACAAAATCATGAACAACCCACCCGGTCGTGTCCTTGTCTGGCTTATCACACTCCT

CATAGGCTTCCCTTTATACTTGATGTTCAACGTCTCTGGACACAAGTATGAGAGGTGGACTTCACACTACGATCCCCACA

GCCCTCTTTACACTGAACGCGAGCGCAAGCAGATCATTGTTTCTGATGTTGCAATCCTTGCTGTTATCTATGGCTTATAC

AATCTAGTACTAGCCAAGGGATTTGTCTGGGTTTTCTGTGTTTATGGAGGTCCATTGCTCGTCGTTAATGGATGGTTCAC

ATTGATCACCATCCTCAACCATACTCATCCTTCTTTGCCTTACTATGATTCAACCGAATGGGATTGGTTGAGAGGAGCTC

TTTGCACTGTGGACAGAGATTATGGAATTTTGAACAAGGTGTTCCACAATGTCTGTAATGCTCATGTTTGTCACCATATC

TTCTCCATGATCCCACATTACCATGGACTCGAAGCAACCGAGGCAATGAAGCCAGTACTGGGAAACTATTATCAGTATGA

TGGGACTCCAATTCTCAAGGCAATGTACAGAGAAATGAAGGAATGCATTTATGTCCAAAAGGATGAAGGTGAGACCAAAG

GAGTCTACTGGTACAGAAAGGAATTTTAG

**Predicted protein**

MGAGGRMSAPTGKKTEAEALRRAPHEKPPFTIGDLKKAIPAHCFEKSVITSFRYLIQDLIMAYALYYVATNYIDQYLPHP

LNYLGWAAYIAVQGCVLTGAWVVGHECDHDAFSDYGWVNDLVGLVVHSSLLVPYFSWKISHRRHHANTQSLENDEVYVPR

FKSNIRNYYKIMNNPPGRVLVWLITLLIGFPLYLMFNVSGHKYERWTSHYDPHSPLYTERERKQIIVSDVAILAVIYGLY

NLVLAKGFVWVFCVYGGPLLVVNGWFTLITILNHTHPSLPYYDSTEWDWLRGALCTVDRDYGILNKVFHNVCNAHVCHHI

FSMIPHYHGLEATEAMKPVLGNYYQYDGTPILKAMYREMKECIYVQKDEGETKGVYWYRKEF.

***DcFAD29*** (chromosome 1)

**Coding sequence (CDS)**

ATGGATCAGATGTCGGATTCGGATAAAAAAGTATCAAGAGTTCCTGTCTCAAGACCCGAATTCACTATCAGTGACCTTAA

GAAAGCTATACCTCCCCATTGCTTTAAGCGTTCTGCTTTTCGCTCTTTTTCATACCTTCTCTCTGATATCACCGTTTTCT

TCTCTCTTTCGTACATTTTCACAACAATCATGACACAACCTATGCATCAAATCTACTTCTATATGACCTGCATTGTTTAT

TCAGTGATACAAGGCTGTGTATTCTCACGGTTCTGGATCATAGGCCACGAATGTGGTCACAGTGCTTTCAGTGAGTACAA

ATGGCTAGACGACACAGTTGGATTCACCCTGCACTCCTTCCTCCTGTTTCCTTACTTCTCGTTTAAGTACAGTCACCACC

GCCACCACACAAAAACCGGTTCTCTTGAACAAGACGAACTAGACATCCCTCTGCTCAAGTCCCAAGTTCCATCAATTCAC

AAGCACTTGACCACACATCCTGTACCAAGATTCTTGGTCATCACTCTGGTTTTAATCTTCGGTGTGCCTCTATACTTGCT

TGTAAACTTCCGTGGTCGTGCTTATAATCAATTCGCCTCTCATTTCTATCGGTTTAGTCCAATGTACTCACCTAACCAAC

GCGCTCAAATCTTACTTTCTGACACTGCATTACTCGCCATGCTCTATGGACTATACACACTCGTTTCACTAAAAGGATTT

GCTTGGATTGCTCTTGTTTACGGAGGACCACACCTGGTTCATACTGGCATGCTTTTCGTCGTGGCCTTACTCCACCACAC

TCACCCTCTAGTACCTTACTATGATTCCACAGAGTGGGATTGGCTAAGGGGATCATTGTCTACCATTGATCGAAACTATG

GAATCCTTGACACAATCTATTATCAAGCAACCAATACTCATGTAGCACATCATCTCTTCACATCAATCCCACATTACCAT

GCAATGGAGGCCACCAGAGCAATCAAACCGATACTCGGAGAGTACTACAGGTATGATGGCACAATATTTTACAAATCGCT

GTGGAGTGCTATTAAAGAGTGTGTCTATGTCGAGGAAGATGAAAGCAAAGGGATTTATTGGTATAACAACAAGCCCTGA

**Predicted protein**

MDQMSDSDKKVSRVPVSRPEFTISDLKKAIPPHCFKRSAFRSFSYLLSDITVFFSLSYIFTTIMTQPMHQIYFYMTCIVY

SVIQGCVFSRFWIIGHECGHSAFSEYKWLDDTVGFTLHSFLLFPYFSFKYSHHRHHTKTGSLEQDELDIPLLKSQVPSIH

KHLTTHPVPRFLVITLVLIFGVPLYLLVNFRGRAYNQFASHFYRFSPMYSPNQRAQILLSDTALLAMLYGLYTLVSLKGF

AWIALVYGGPHLVHTGMLFVVALLHHTHPLVPYYDSTEWDWLRGSLSTIDRNYGILDTIYYQATNTHVAHHLFTSIPHYH

AMEATRAIKPILGEYYRYDGTIFYKSLWSAIKECVYVEEDESKGIYWYNNKP.

***DcFAD30*** (chromosome 3)

**Coding sequence (CDS)**

ATGGAGCGAAAAAATGTATCCAGAACTCCCCAGTTGAAACCTCCTTTCACTCTTGGTGATGTTAAGAAAGCAATTCCCCC

TCATTGCTTTGAGCGTCCTGTTCTTCGCTCTTTCTCATTCCTTCTCTTTGATGTCGTCATGTTATGCTCCCTTTTCTGCA

TTTTCGCAAAATTTATCATTACAGAGCAGTCTCGGTTTTATTTCCTTGTGTATATGGTCATGTACTCACAGCTTCAAGGC

TGTGTGTTCTCTCGGTTTTGGATCATAGGCCATGAATGTGGTCATAATGCTTTTAGTGACTACAGATGGCTGAATGACAC

AGTCGGATTCATCGTCCACTCCTTCCTCCTGTTTCCTTACTTCTCATGGAAGTACAATCACCGTCGTCACCACTCCAGAA

CAGGACATCTGCACAAAGAAGAATTCAACGGCCCAATGCTCAAGTCTGAGGTTCCCTTAATTTTCAAGCACCTGATCACG

AATCCTGCAACAAGATTCTTGGTTACTTTCATAGTTTTAGCTTTTGGTGTGCCTCTATACTTGCTTGTCAACTTTCGTGG

TCGAGCTTATGATCGATTTGCCTCCCAATTTGATCCCTATAGTCCCATGTTTTCACGTAACCAACGCGCTCAAGTCTTTG

TTTCTGATGCTGCATTTCTGACCATGGTCTATGCACTGTACAAACTTGTTTCATTGAAAGGCTTTGCATGGGTTGCTTGT

GCTTACGGAGGACCATACCTAGTTCAGACTTCTAATGTCTTCCTAGTAGCTATACTTCAACACACGCACCCTTTCGTACC

TTTCTACGATTCCAGTGAGTGGGATTGGCTAAGGGGATCTCTGGGTACCATTGACAGAGATTTTGGAATTCTCAATACTA

TGCATTATCAATCAACAAATACTCATGTAGCTCACCATCTGTTCCCAACAATCCCACATTACCATGCAAAGGAAGCCACT

GAAGCCATTAAGCCTATTCTGGGGGAATACTATCGGTATGATGACACCCCAATCTATAAAGCACTGTGGACTACTTTTAA

GGAATGTGTTTATGTTGAGGAAGATGAAGGTGACCAAAACAAAGGGATATATTGGTATAAATATAAGTTCTGA

**Predicted protein**

MERKNVSRTPQLKPPFTLGDVKKAIPPHCFERPVLRSFSFLLFDVVMLCSLFCIFAKFIITEQSRFYFLVYMVMYSQLQG

CVFSRFWIIGHECGHNAFSDYRWLNDTVGFIVHSFLLFPYFSWKYNHRRHHSRTGHLHKEEFNGPMLKSEVPLIFKHLIT

NPATRFLVTFIVLAFGVPLYLLVNFRGRAYDRFASQFDPYSPMFSRNQRAQVFVSDAAFLTMVYALYKLVSLKGFAWVAC

AYGGPYLVQTSNVFLVAILQHTHPFVPFYDSSEWDWLRGSLGTIDRDFGILNTMHYQSTNTHVAHHLFPTIPHYHAKEAT

EAIKPILGEYYRYDDTPIYKALWTTFKECVYVEEDEGDQNKGIYWYKYKF.

***DcFAD31*** (chromosome 4)

**Coding sequence (CDS)**

ATGGACCGAAAATCGGATTGTAGCGTGAAAAGAACATTAAGATCTCCCCACACCAAACCTCCATTCACTCTAAGTGATGT

CAAGAAAGCAGTTCCACCACATTGTTTTCAGCGTTCGGCTATTCGCTCTTTGTCATATCTCGCCTTAGATCTCTTCATTT

CTTTCTCTCTTTACTACATTGCCGCAACCTATATCTTAACATCGGAAGTAGTCAAGTCATCCAAATTATATTTTCTTACT

TGTTGGATTATATATTCATTGCTTCAAGGATGCATACTTGCTCGATTTTGGGTCATAGGTCACGAATGTGGGCACGGGGC

ATTCAGCGACTACAAATGGCTCGACGATACAGTCGGATTCCTCACACACTCTCTCGTCCTGTTTCCTTATTTTTCATTCA

AGTTTAGTCACCATCGTCACCACTTGAGAACCGGATCCCTCGAAGAGGAGGAATTCGACATCCCTTTGCTCAAGAATCAA

GTCTCGTTTATTTTTAAATACCTCAACAATCCTGTCGCCAGATTTTTTGTCATTCTCTTGGTTCTAATTGTTGCGGTGCC

TCTGTACTTGCTTGTCAACTTCCGTGGCCGTACTTACGAC**TGA**TTTGCCTCTCATTTTGATCCGTATAGTCCAATGTTCT

CACGAAAACAACGTGCTCAAGTCTTGCTTTCGGATGCTGGATGTTTGGCCGTGATCTATGCAGTCTACAAACTTGCTCTG

TTGAAAGGCTTCGCTTGGATTGGTTTTATTTACGGAGGACCGTACCTGTTCCAAAATGCAATGCTGATCATAGTGGCTGT

ACTTCAACACACAAACCCTCTTGTGCCTTACTACAATTCCACAGAGTGGGAGTGGTTGAAGGGATCCATGGCCACTATTG

ATCGCGATTTTGGATTTCTTAACACGGTGTTTCATCAGCAGCCGAATACACATGTAGCGCATCATCTCTTTCCCAAAATG

CCGCATTACCATGAAGTGGAAGCCACCAGAGCATTTAAACCTATATTGGGGGAGTACTATCAGTTTGATTACACACCATT

TTATAAATCACTGTGGAGTACTCTAAAAGATTGTGTATATGTTGAGGAAGATGAGCAAAACAAAGGGATTTATTGGTATA

ACAATAAGTTTTAA

**Predicted protein**

MDRKSDCSVKRTLRSPHTKPPFTLSDVKKAVPPHCFQRSAIRSLSYLALDLFISFSLYYIAATYILTSEVVKSSKLYFLT

CWIIYSLLQGCILARFWVIGHECGHGAFSDYKWLDDTVGFLTHSLVLFPYFSFKFSHHRHHLRTGSLEEEEFDIPLLKNQ

VSFIFKYLNNPVARFFVILLVLIVAVPLYLLVNFRGRTYD**.**FASHFDPYSPMFSRKQRAQVLLSDAGCLAVIYAVYKLAL

LKGFAWIGFIYGGPYLFQNAMLIIVAVLQHTNPLVPYYNSTEWEWLKGSMATIDRDFGFLNTVFHQQPNTHVAHHLFPKM

PHYHEVEATRAFKPILGEYYQFDYTPFYKSLWSTLKDCVYVEEDEQNKGIYWYNNKF.

Note: the premature stop codon at position nt 601-603 (sequence not yet verified by cloning and resequencing)

***DcCER1-3*** (chromosome 7)

**Coding sequence (CDS)**

ATGGCTACTAACCCGGGCATTCTCACTGACTGGCCATGGACACCCCTTGGAAGCTACAAGTATGTGGTTTTGGCACCATT

TGTGGTTCATAGCATTCACTCGTACATAACGAAGGATGAGAACGAAAGAGACTTGTCCAACTTTCTGATATTCCCGTTTC

TTCTGTGGAGGATGCTTCATAATCAGATTTGGATTTCCCTTTCTCGCTACAGAACTGCCAAAGGCAACAACCGGATTGTT

GATAGAACTATTGAATTTGAGCAGGTTGATCGAGAGAGAAACTGGGATGACCAAATCTTGTTTAATGGGATACTGTATTA

TTTGGTTAACTTGACAATGAAAGGAGGGTCTCATCTGCCTTTTTGGAGGACTGATGGTATTCTTATCACAATTCTGATTC

ATGCTGGACCTGTTGAATTCATCTACTACTGGCTTCACAGAGCATTACACCACCACTACCTCTATTCTCGCTATCATTCT

CATCATCATTCCTCTATTGTTACTGAGCCTATTACATCTGTTATTCATCCATTTGCAGAACACATATCGTATTTTTTGCT

CTTTGCAATACCACTGATGACCGCTGCACTGACGGAGACGGGCTCTATCGCTTTATTCCTTTTTTACATAACTTTTGTGG

ACTTCATGAACAATATGGGACACTGCAACTTTGAGCTTATCCCTAAGAAGCTGTTTTCCATCTTTCCTCCTCTCAAGTAC

ATCATGTATACGCCCTCGTACCATTCTCTGCATCATACACAATTCCGAACCAACTACTCGCTTTTCATGCCTTTCTATGA

CTACATGTATGGCACCATGGACAAGTCTACAGACACATTATATGAAACTTCACTCAAAAGAGAGGAGGAGTCTGCTAATG

TGGTACATCTGACACATCTGACCACACCAGAATCTATTTATCATCTTCGTGTTGGATTCGCCTCTTTAGCATCAAAACCC

CAGAGTACTTCACAGTGGTACATGTGGTTAATGTGGCCTGTGACATTCTGGTCTATGATTGTTACATGGTTTTACGGTCA

AACATTTGTTATTGAGAGGAATATATTCAAAAATCTGAACTTGCAAACATGGGCTATTCCAAGATACAGCATACAATACA

CTACAGTCAAGCAAAGAGAGAGTATCAATTGTTTGATTGAAGAGGCGATAGTTGAAGCTGAGAGAAAAGGAATTATGGTT

TTAACTTTAGGCCTTCTTAATCAGGGAGAGGAGATGAACAGCAATGGTGAGCTTTTTATACGAAGGAATCCTAAGCTAAA

AGTGAAGTTAGTTGATGGGAGTAGCCTAGCAGTTGCTGTTGTTCTGAATAGCATTCCAAAGGGAACGACTCAAGTCGCCA

TTAAAGGCAACTTATCCAAGGTCTCCAATTCCATTGCCATTGCTTTGTGTCGCAGAGGTGTCCAGGTATTTATTTCCTGC

GAATATGGTTATAAAAGGCTCACGGAAACGTGTGATTCTGAGACTCAAAAGAATTTGGTCCTTTCAGATAGTTCTTCTCA

GCAGATATGGTTAGTGGGAGATAAATTGGGAAAGAAAGAACAGATGAAGGCCTCAAAGGGAACATTATTCATCCCTTTCT

CTCAGTTTCCCCCAAAGAAATTGCGCAAAGATTGCTTCTACTGCAATATTCCAGCAATGTCTGCTCCAGTGCATCTCCAG

AATCTGGACTCTTGTGAGAATTGGTTGCCAAGAAGGGTGATGAGTGCATGGCGTATAGCTGGAATAGTGCATGCATTAGA

AGAATGGAATGTACATGAATGTGGCAATATGATGTTCAGCATCGAAAAGATTTGGAAAGCTACTCTTGAGCATGGGTTTC

GTCCCCTCCCAGTGCCCACATAA

**Predicted protein**

MATNPGILTDWPWTPLGSYKYVVLAPFVVHSIHSYITKDENERDLSNFLIFPFLLWRMLHNQIWISLSRYRTAKGNNRIV

DRTIEFEQVDRERNWDDQILFNGILYYLVNLTMKGGSHLPFWRTDGILITILIHAGPVEFIYYWLHRALHHHYLYSRYHS

HHHSSIVTEPITSVIHPFAEHISYFLLFAIPLMTAALTETGSIALFLFYITFVDFMNNMGHCNFELIPKKLFSIFPPLKY

IMYTPSYHSLHHTQFRTNYSLFMPFYDYMYGTMDKSTDTLYETSLKREEESANVVHLTHLTTPESIYHLRVGFASLASKP

QSTSQWYMWLMWPVTFWSMIVTWFYGQTFVIERNIFKNLNLQTWAIPRYSIQYTTVKQRESINCLIEEAIVEAERKGIMV

LTLGLLNQGEEMNSNGELFIRRNPKLKVKLVDGSSLAVAVVLNSIPKGTTQVAIKGNLSKVSNSIAIALCRRGVQVFISC

EYGYKRLTETCDSETQKNLVLSDSSSQQIWLVGDKLGKKEQMKASKGTLFIPFSQFPPKKLRKDCFYCNIPAMSAPVHLQ

NLDSCENWLPRRVMSAWRIAGIVHALEEWNVHECGNMMFSIEKIWKATLEHGFRPLPVPT.
