# Supplementary material for: The Genetic Control of Polyacetylenes Involved in Bitterness of Carrots (Daucus Carota L.): Identification of QTLs and Candidate Genes From the Plant Fatty Acid Metabolism
Source: Research Square preprint supplement (doi:10.21203/rs.3.rs-1102862/v1), 2021-11-30
Supplement: Supplementary file 4 [file 830ed7913488f50e17c07963.docx]

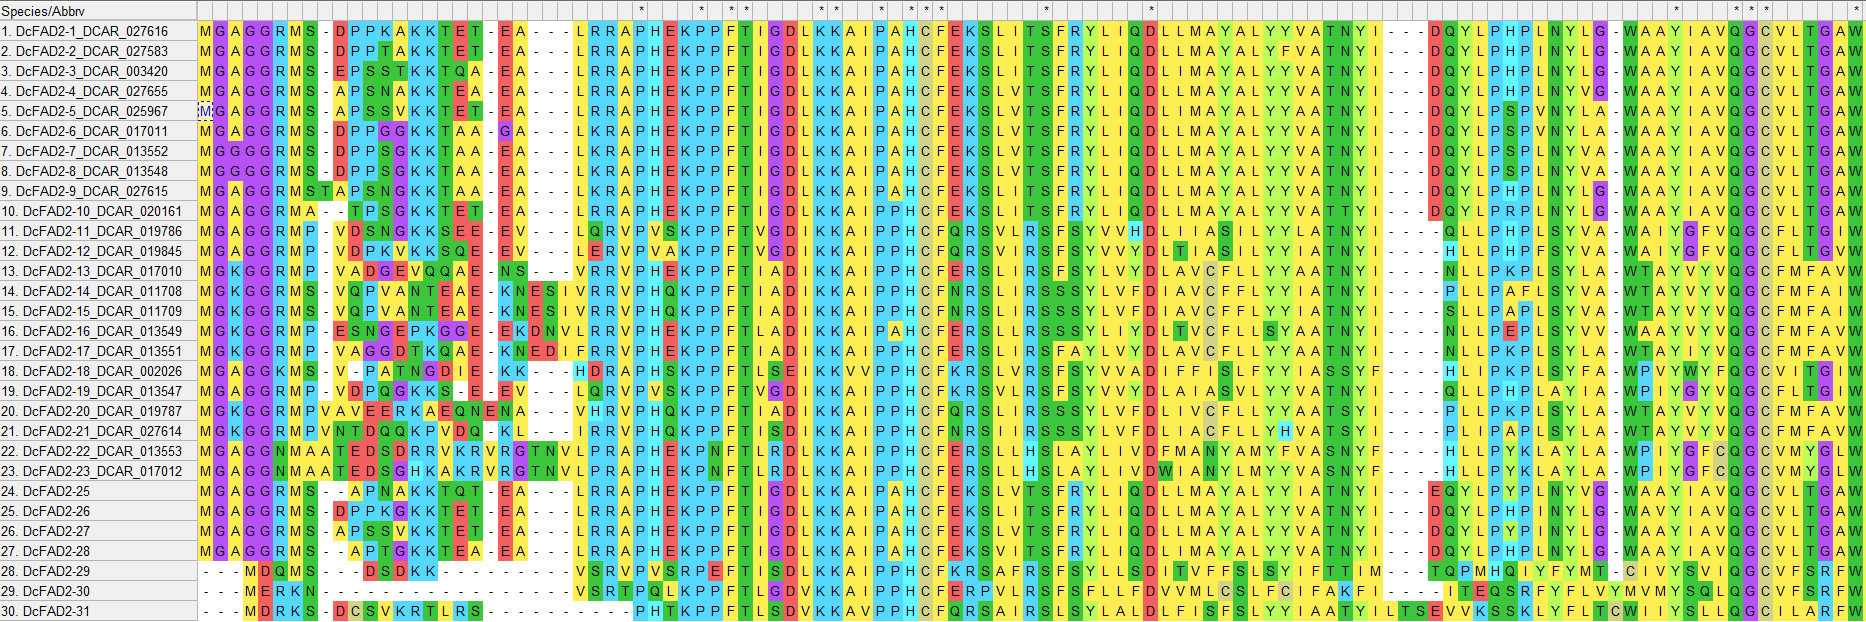


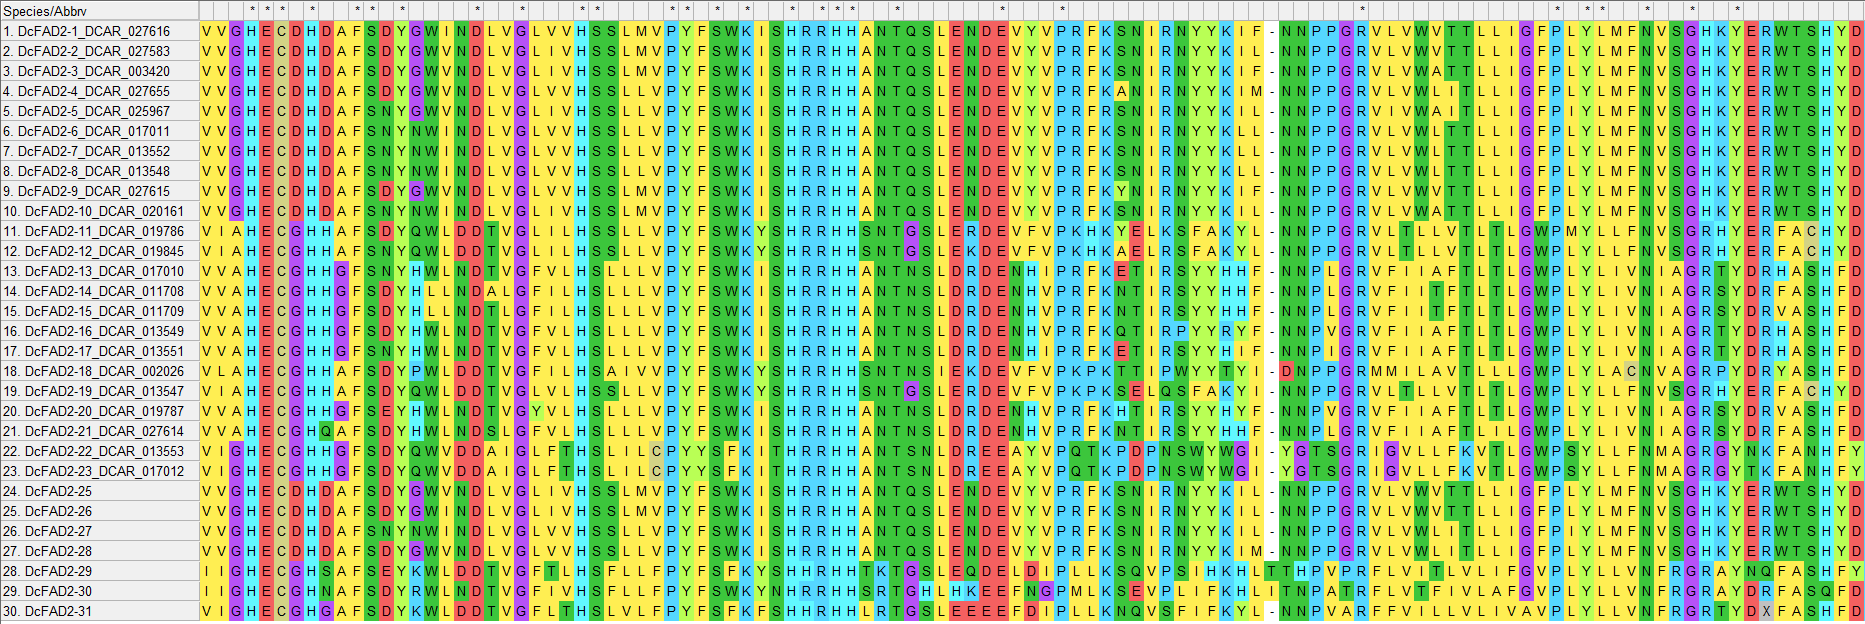


HXXHH

HXXXH


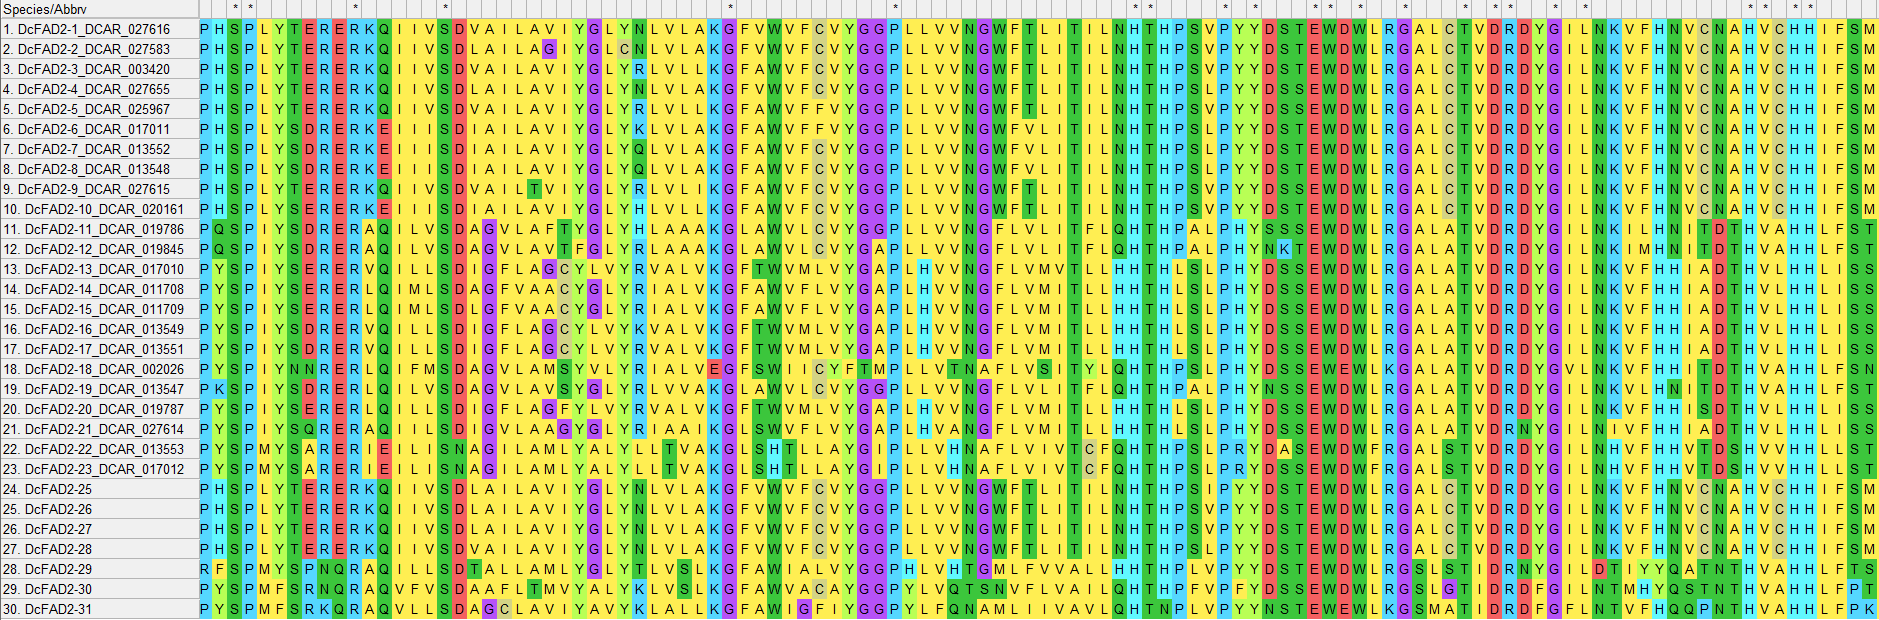


HXXHH


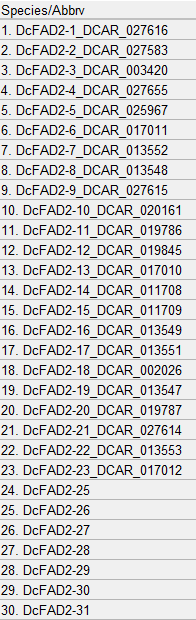

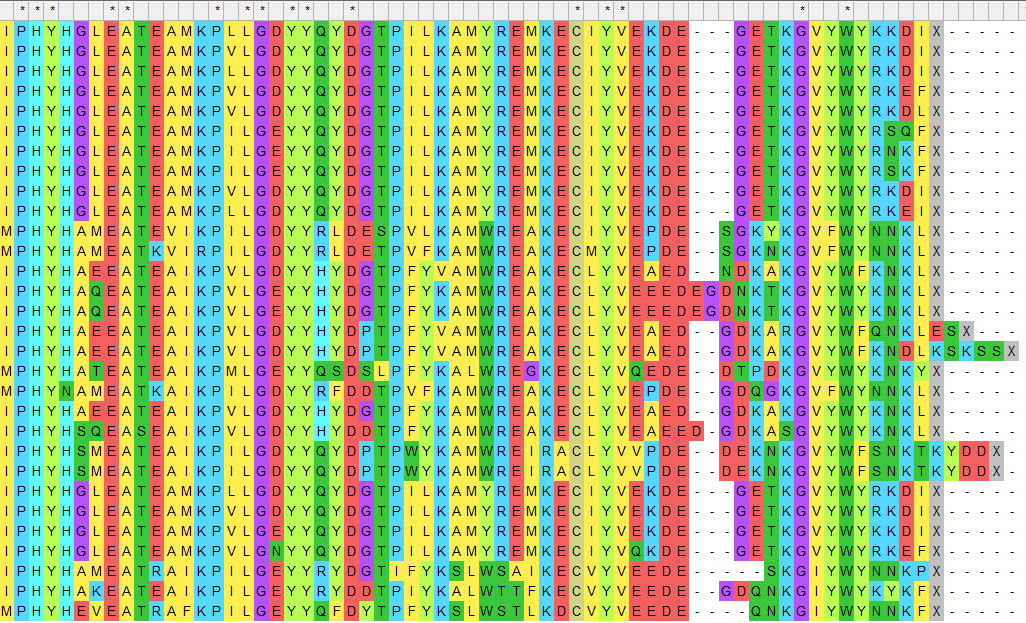


ER localization

**Figure S4** Alignment (MEGA-X, Muscle) of the predicted protein sequences of 23 *D. carota* *FAD2s* [5] and seven newly identified carrot FAD2s (*DcFAD2-25* to *DcFAD2-31*, this study). Three putative His boxes are underlined in blue. The position of the G/A residues putatively promoting acetylenase activity is marked by a black arrow. Residues indicating divergent FAD2 function (according [5]) are marked with red arrows. The putative ER localization motif at the C-terminus is underlined in black.
