# Supplementary material for: The Genetic Control of Polyacetylenes Involved in Bitterness of Carrots (Daucus Carota L.): Identification of QTLs and Candidate Genes From the Plant Fatty Acid Metabolism
Source: Research Square preprint supplement (doi:10.21203/rs.3.rs-1102862/v1), 2021-11-30
Supplement: Supplementary file 8 [file cf3295950da7328e3bc1ae46.docx]

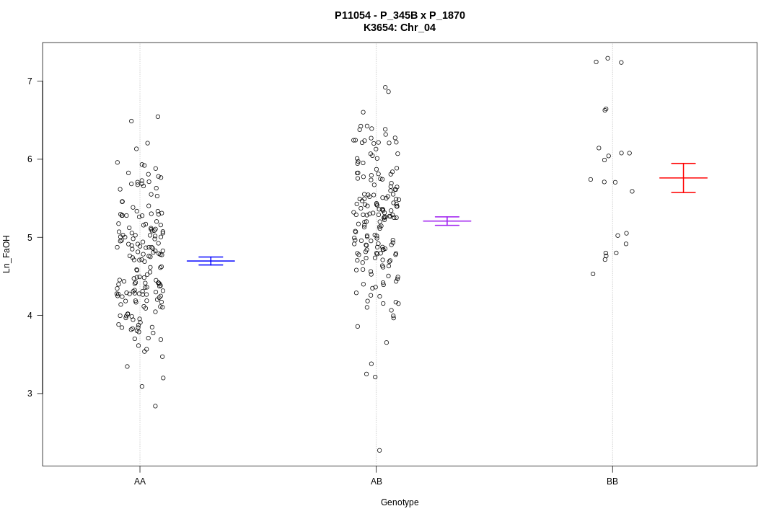

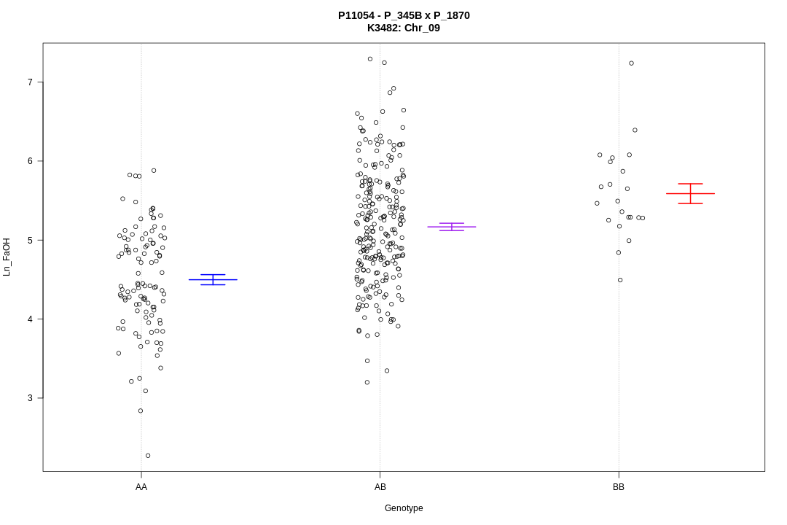


**b**

**a**


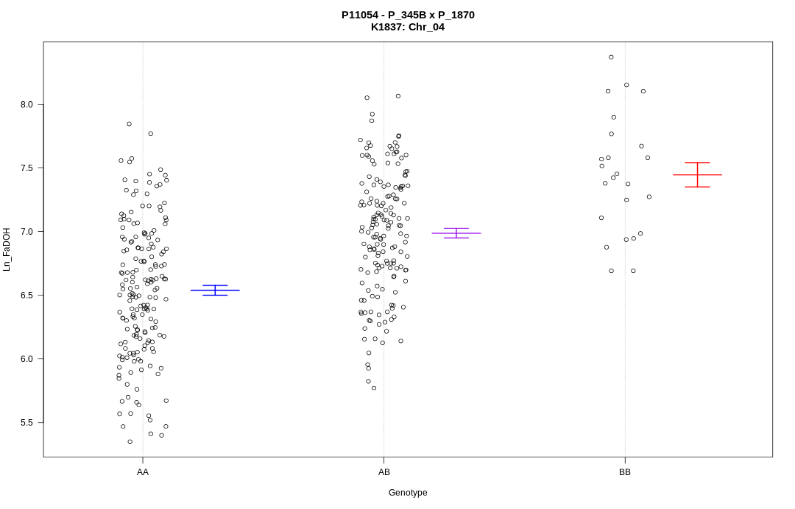

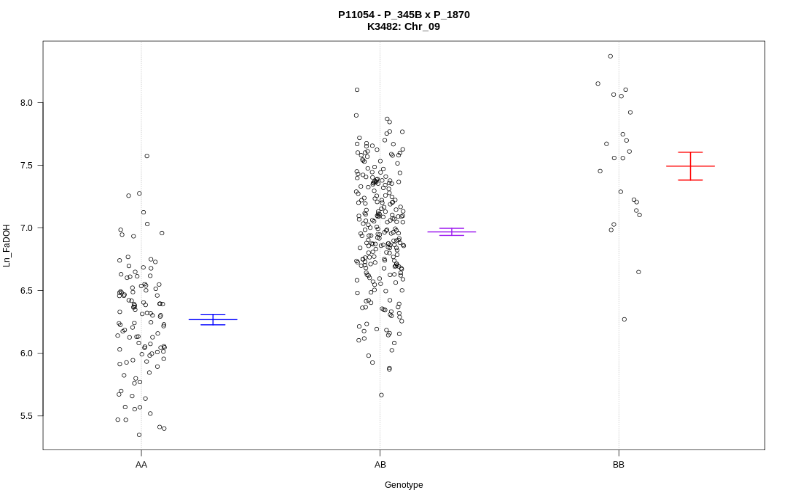


**d**

**c**

**Figure S3** PA contents of marker genotypes. Phenotypic distribution is shown for peak markers of the following major QTLs: **a** *FaOH_4.1* (K3654), **b** *FaOH_9.1* (K3482), **c** *FaDOH_4.1* (K1837), **d** *FaDOH_9.1* (K3482).
