# Supplementary material for: The Genetic Control of Polyacetylenes Involved in Bitterness of Carrots (Daucus Carota L.): Identification of QTLs and Candidate Genes From the Plant Fatty Acid Metabolism
Source: Research Square preprint supplement (doi:10.21203/rs.3.rs-1102862/v1), 2021-11-30
Supplement: Supplementary file 9 [file 4bbc1d0ba0362483c100cc58.docx]

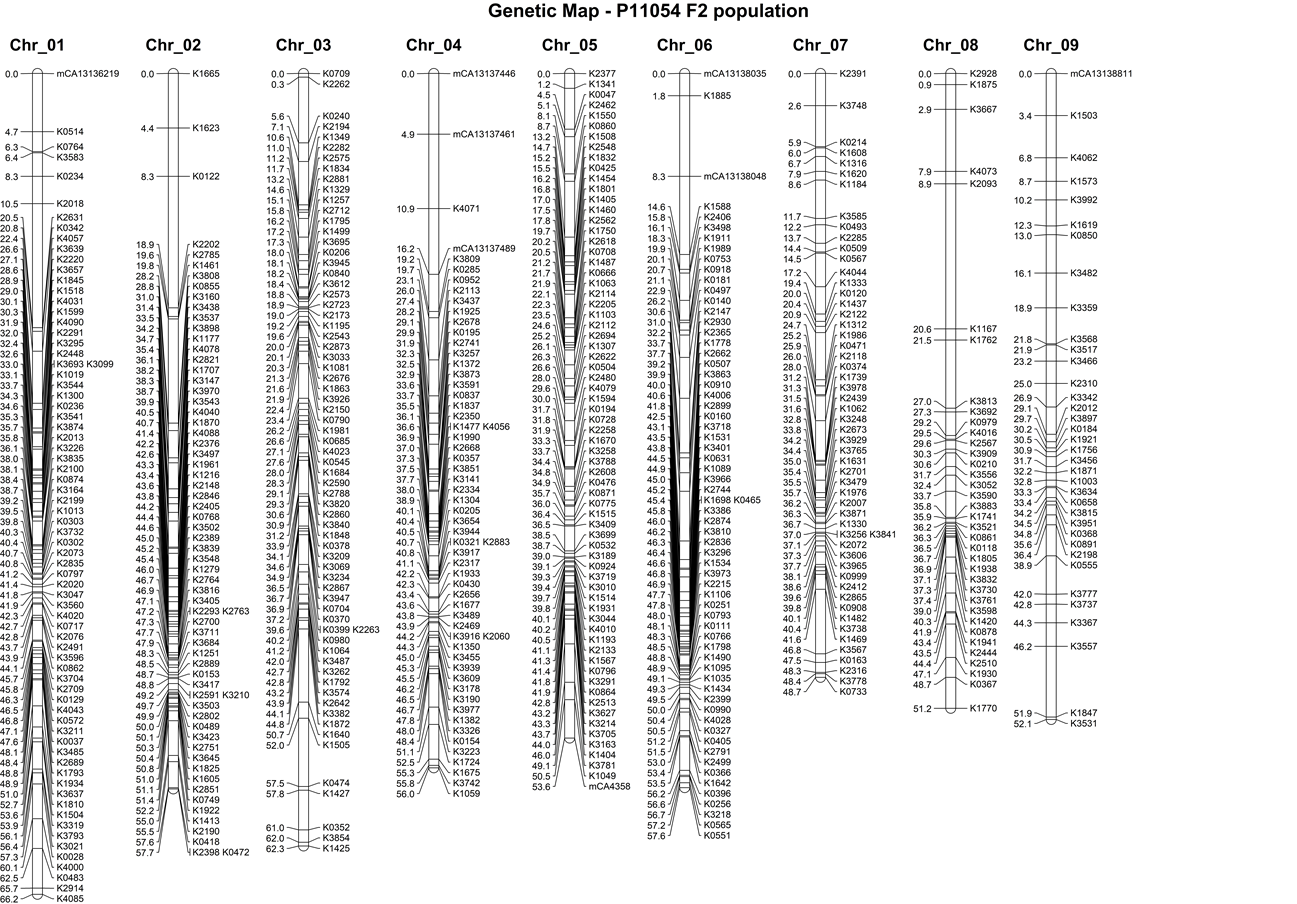


**Figure S2** Genetic map of F2 population P11054 (called CA in this study), based on 374 individuals and 526 SNP markers
