# Supplementary material for: The Genetic Control of Polyacetylenes Involved in Bitterness of Carrots (Daucus Carota L.): Identification of QTLs and Candidate Genes From the Plant Fatty Acid Metabolism
Source: Research Square preprint supplement (doi:10.21203/rs.3.rs-1102862/v1), 2021-11-30
Supplement: Supplementary file 10 [file 61e92c8f0ecaa5f055f965ee.docx]

**Figure S7** Amino acid identity (%) of 12 CER1/3s identified in this study

**1**

**2**

**3**

**4**

**5**

**6**

**7**

**8**

**9**

**10**

**11**

**12**

**1**

73.6

78.2

72.9

58.0

58.6

33.3

32.7

33.2

33.5

34.9

33.9

**1**

DcCER1-1

**2**

74.7

71.4

59.2

58.6

34.6

34.6

33.4

34.7

35.6

35.9

**2**

DcCER1-2

**3**

79.4

61.3

59.8

32.6

34.1

32.4

34.3

35.6

33.8

**3**

DcCER1-3

**4**

61.6

61.1

34.2

34.6

33.6

34.3

35.7

34.7

**4**

DcCER1-4

**5**

72.5

34.2

34.4

34.3

35.1

35.5

36.1

**5**

DcCER1-5

**6**

35.2

34.8

35.7

36.5

37.3

35.8

**6**

DcCER1-6

**7**

85.3

79.2

61.2

62.1

63.2

**7**

DcCER3-1

**8**

80.3

62.3

63.1

63.5

**8**

DcCER3-2

**9**

63.2

63.7

63.7

**9**

DcCER3-3

**10**

85.5

72.1

**10**

DcCER3-4

**11**

73.6

**11**

DcCER3-5

**12**

**12**

DcCER3-6

**1**

**2**

**3**

**4**

**5**

**6**

**7**

**8**

**9**

**10**

**11**

**12**
