# Supplementary material for: The Genetic Control of Polyacetylenes Involved in Bitterness of Carrots (Daucus Carota L.): Identification of QTLs and Candidate Genes From the Plant Fatty Acid Metabolism
Source: Research Square preprint supplement (doi:10.21203/rs.3.rs-1102862/v1), 2021-11-30
Supplement: Supplementary file 12 [file aa4402f4ac88bd0d57fb3556.docx]

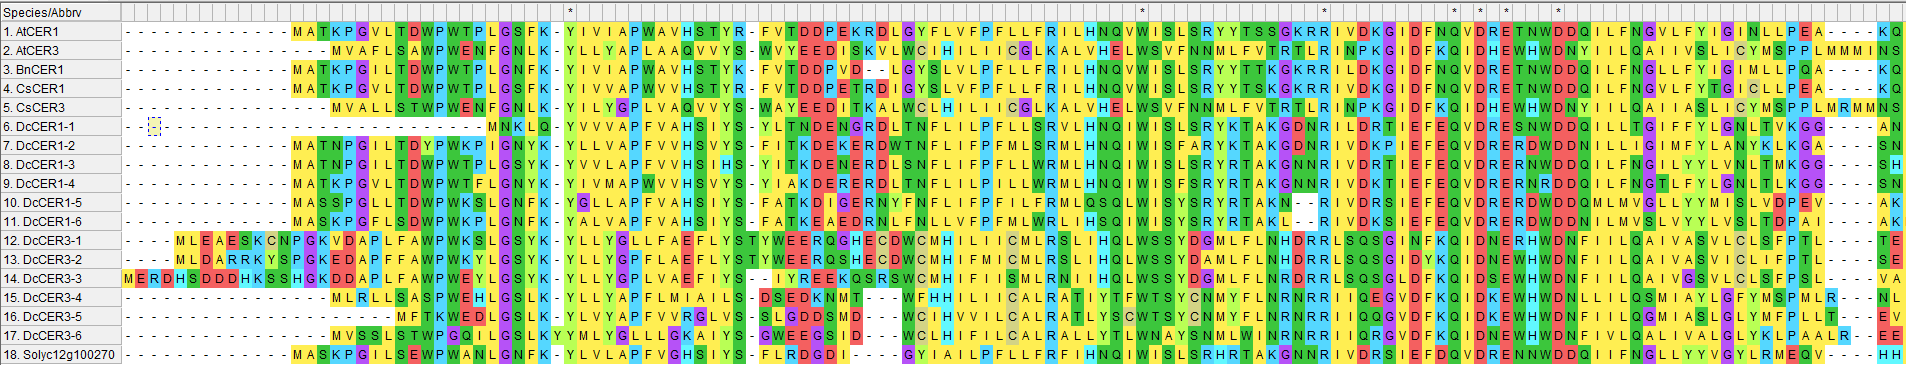


HXXHH


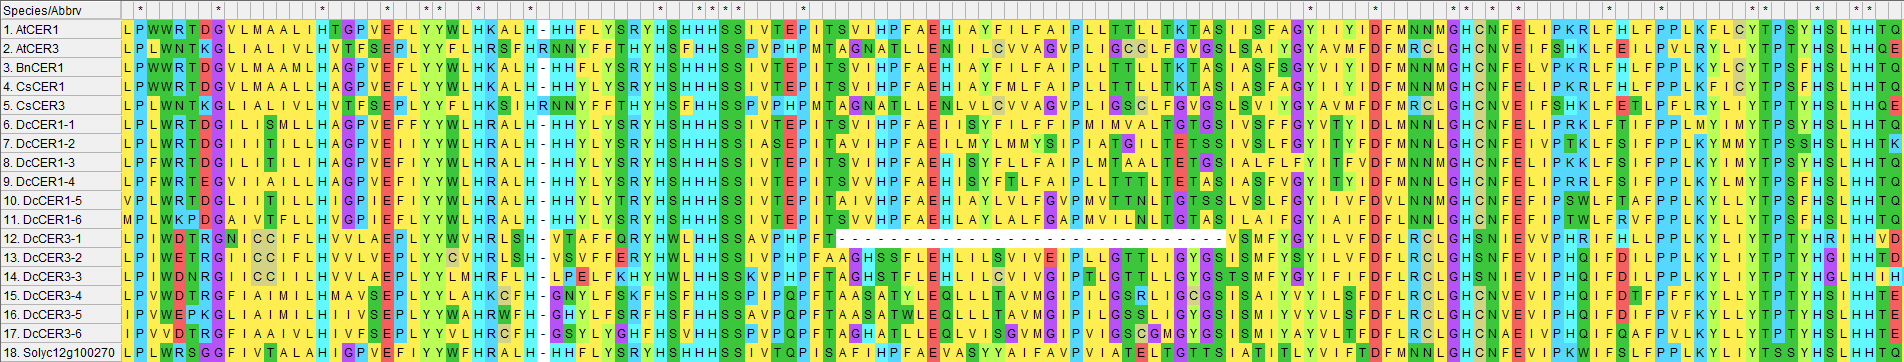


HXXHH

HXXXH


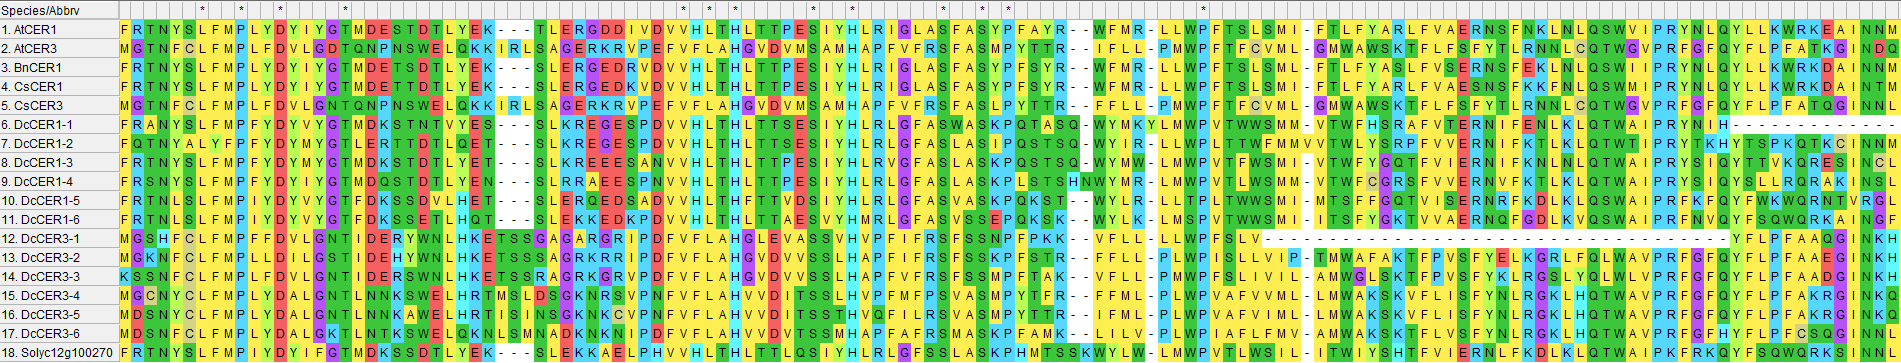


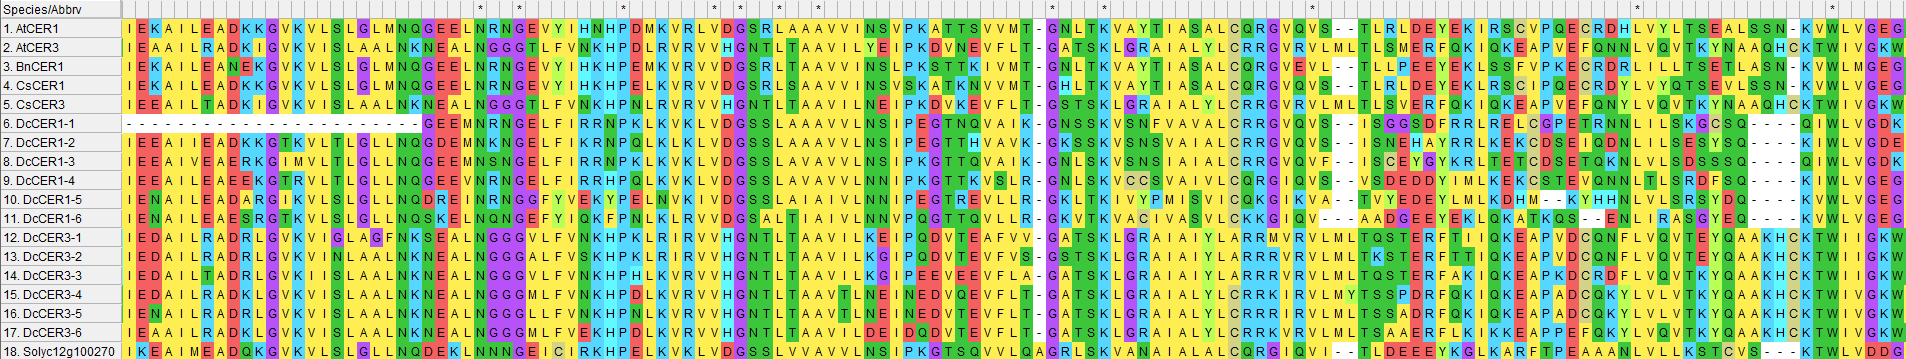


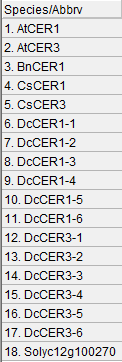

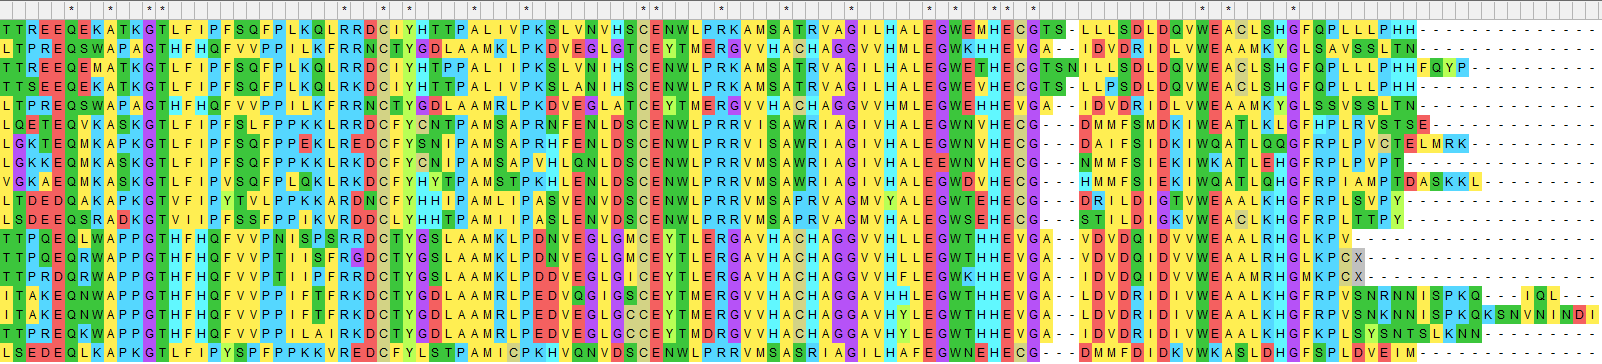


**Figure S6** Alignment (MEGA-X, Muscle) of the predicted protein sequences of 12 *D. carota* *CER1* and *CER3* genes (see Table 2**)** and comparison with other known plant *CER1/3s* (*AtCER1*_NP_171723.2 and *AtCER3*_ NP_200588.2 from *A. thaliana*; *CsCER1*_KJ461885 and *CsCER3*_AIE57504.1 from *Camelina sativa; BnCER1*_KF724897 from *Brassica napus*) and the putative tomato *CER1* gene *Solyc12g100270* [27]. Three putative His boxes are underlined.
